# Supplementary material for: Early disappearance of tumor antigen-reactive T cells from peripheral blood correlates with superior clinical outcomes in melanoma under anti-PD-1 therapy
Source: PubMed Central journal article supplement — J Immunother Cancer. 2021 Dec 21;9(12):e003439. doi: 10.1136/jitc-2021-003439 (PMC8693089; doi:10.1136/jitc-2021-003439), 2021-12-21
Supplement: jitc-2021-003439supp001.pdf [file jitc-2021-003439supp001.pdf]

## **Early disappearance of tumor-reactive T cells from peripheral blood correlates with superior clinical outcomes in melanoma under anti-PD-1 therapy**

Jonas Bochem<sup>1\*</sup>, Henning Zelba<sup>1\*</sup>, Janine Spreuer<sup>1</sup>, Teresa Amaral<sup>1</sup>, Andrea Gaißler<sup>1</sup>, Oltin Tiberiu Pop<sup>2</sup>, Karolin Thiel<sup>3</sup>, Can Yurttas<sup>3</sup>, Daniel Soffel<sup>1</sup>, Stephan Forchhammer<sup>1</sup>, Tobias Sinnberg<sup>1</sup>, Heike Niessner<sup>1</sup>, Friedegund Meier<sup>4</sup>, Patrick Terheyden<sup>5</sup>, Alfred Königsrainer<sup>3,6,7</sup>, Claus Garbe<sup>1</sup>, Lukas Flatz<sup>1</sup>, Graham Pawelec<sup>8,9</sup>, Thomas K. Eigentler<sup>1</sup>, Markus W. Löffler<sup>3,6,7,9,10</sup>, Benjamin Weide<sup>1</sup>, Kilian Wistuba-Hamprecht<sup>1,9,11</sup>

1. Department of Dermatology, University Medical Center, Tübingen, Germany
2. Institute for Immunobiology, Kantonsspital St. Gallen, St. Gallen, Switzerland
3. Department of General, Visceral and Transplant Surgery, University Hospital, Tübingen, Germany
4. Skin Cancer Center at the University Cancer Centre and National Center for Tumor Diseases Dresden; Department of Dermatology, Faculty of Medicine and University Hospital Carl Gustav Carus, Technische Universität Dresden, Germany
5. Department of Dermatology, University of Lübeck, Lübeck, Germany
6. German Cancer Consortium (DKTK) and German Cancer Research Center (DKFZ) Partner Site Tübingen, Tübingen, Germany
7. Cluster of Excellence iFIT (EXC 2180) "Image-Guided and Functionally Instructed Tumor Therapies", University of Tübingen, Tübingen, Germany
8. Health Sciences North Research Institute of Canada, Sudbury, ON, Canada
9. Department of Immunology, University of Tübingen, Tübingen, Germany
10. Department of Clinical Pharmacology, University Hospital Tübingen, Tübingen, Germany
11. Department for Internal Medicine I, University Medical Center Tübingen, Tübingen, Germany

\* J Bochem and H Zelba contributed equally

## Supplemental material

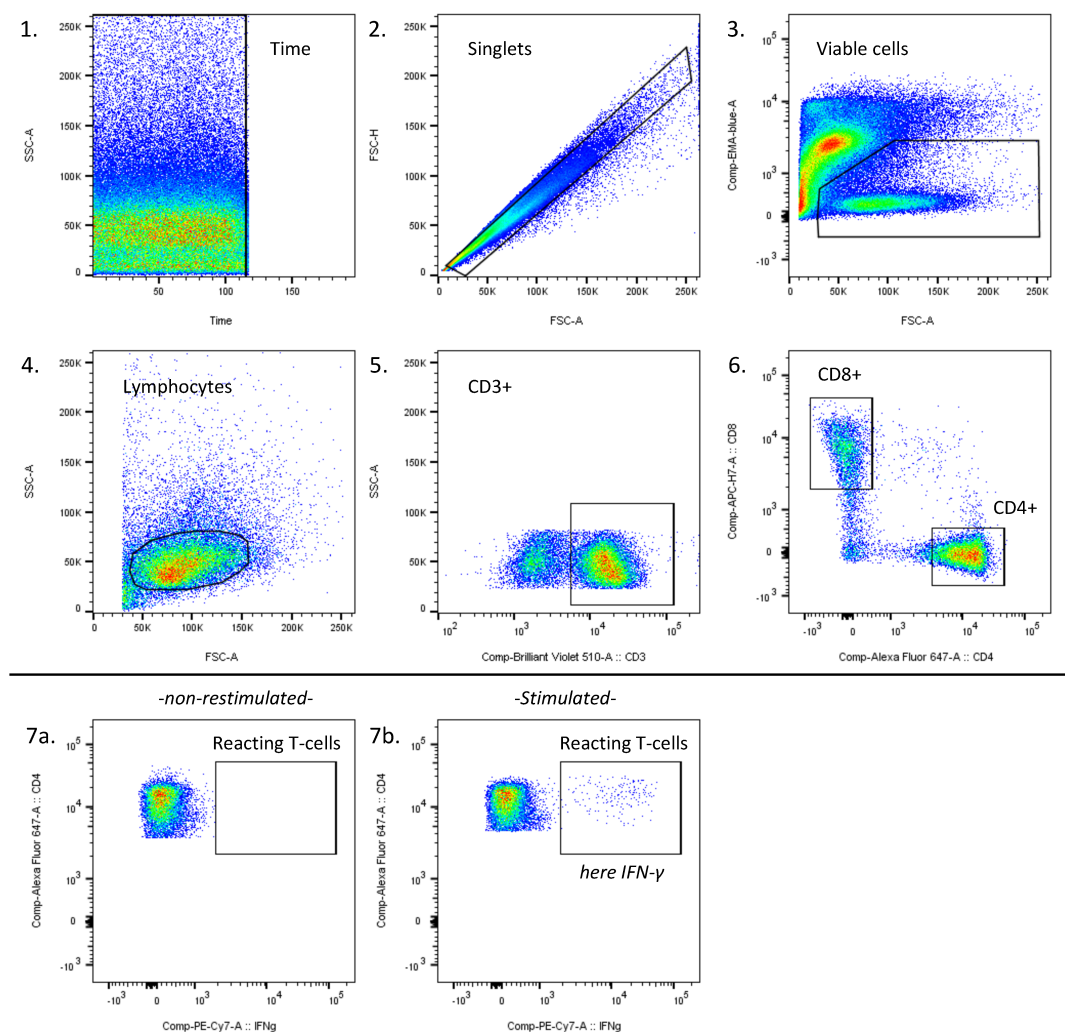

**Supplemental Figure 1:** Gating strategy for flow cytometry data analysis. First a time gate was used to select the measured cells and to monitor for eventually occurring pressure variability of the system. Next, single cells were identified by plotting FSC-H against FSC-A. Dead cells (high proportions expected after 13 day culture of PBMCs while only stimulating antigen specific T cell clones) and debris was excluded using the DNA intercalator ethidium bromide monoazide (EMA). A morphological gate identified the viable lymphocyte population. T cells were identified as expressing CD3 on their surface and were further subdivided into CD4+ and CD8+ cells. Both were then separately examined for the expression of functional markers (here as example the expression of IFN- $\gamma$ ) using a non-restimulated control.

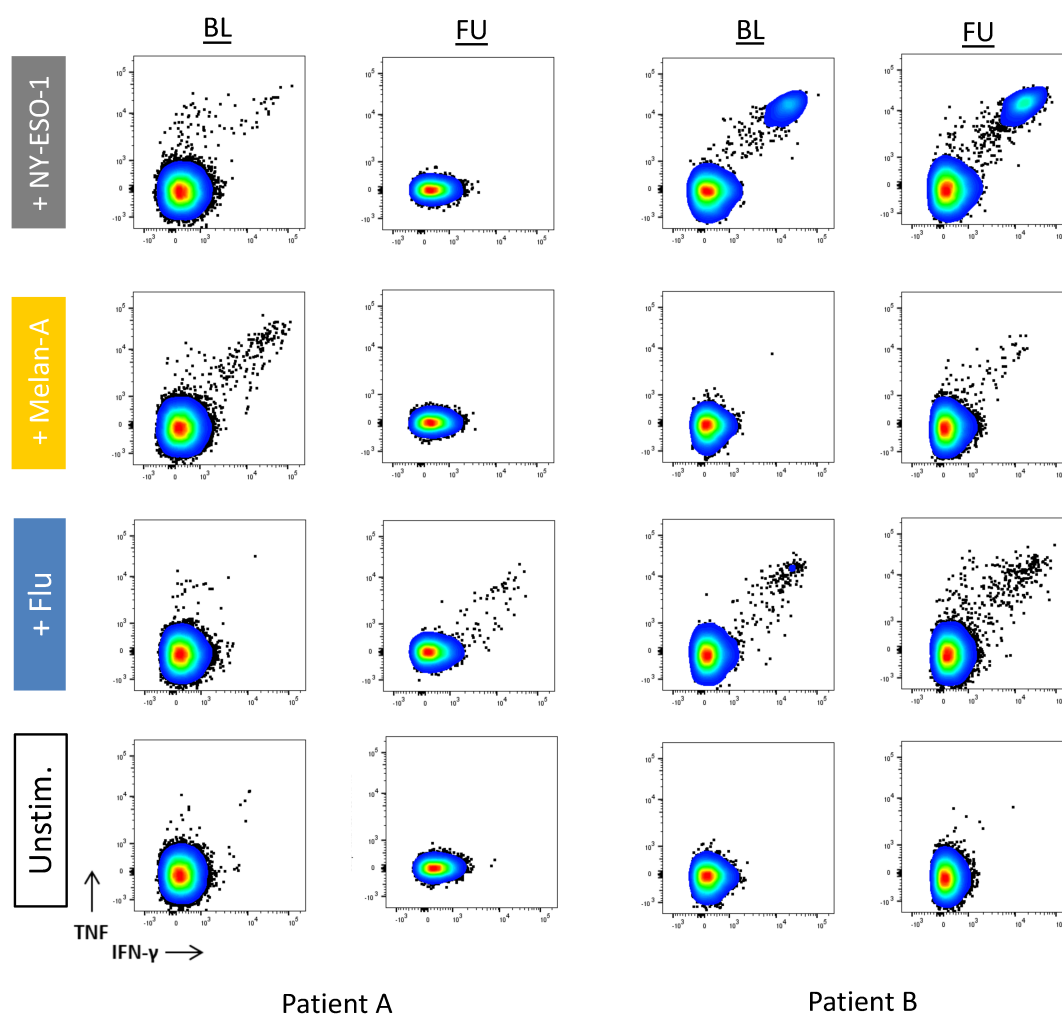

**Supplemental Figure 2:** Definition of T cell responses: IFN- $\gamma$  (x-axis) and TNF (y-axis) production by CD4+ T cells activated with either NY-ESO-1-derived, Melan-A-derived, Influenza-derived peptides or left unstimulated (Unstim.). Examples of 2 patients (A & B) are shown before start of ICB (BL) and under therapy (FU).

In patient A, both NY-ESO-1- and Melan A-reactive T cells disappeared from the blood, whereas in patient B, Melan A-reactive T cells appeared during therapy, and NY-ESO-1-reactive T-cells remained present. For both patients, Flu-reactive T-cells were not affected.

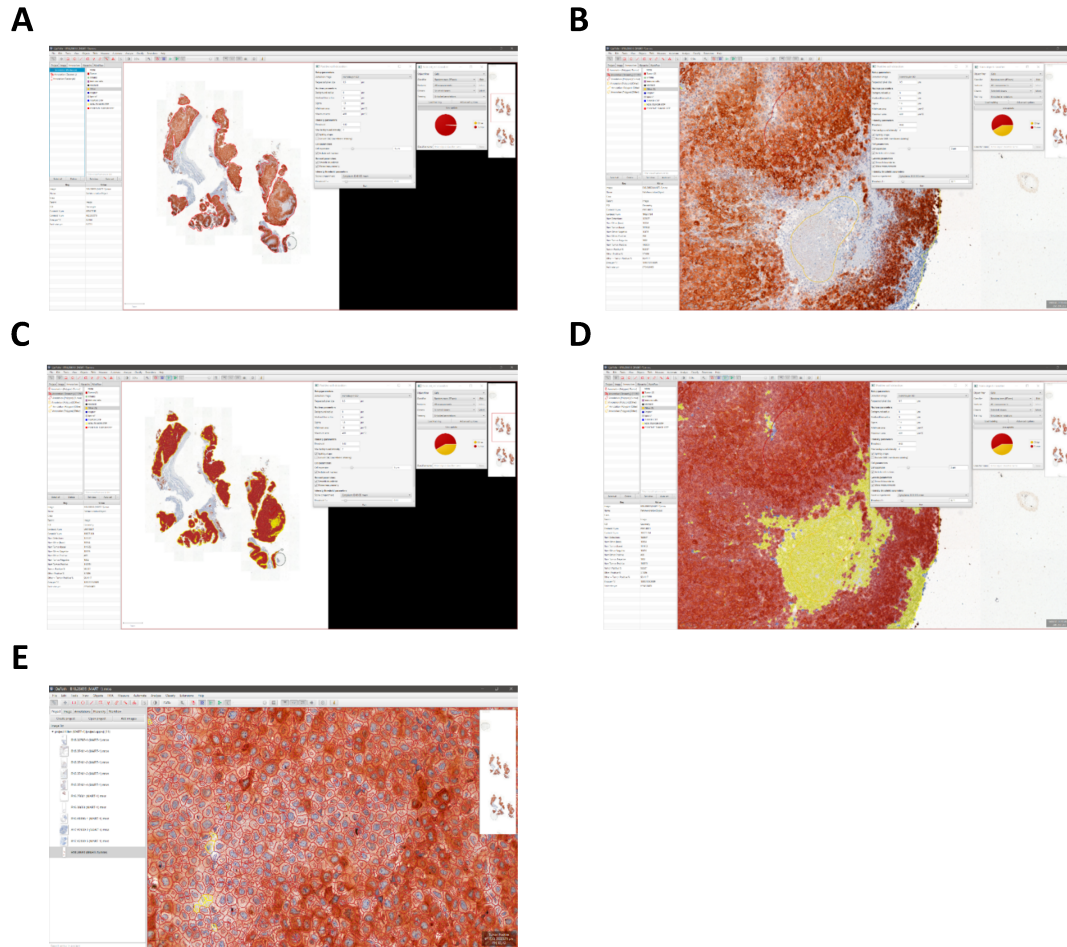

**Supplemental Figure 3:** Morphometric analysis of Melan A expression using QuPath software. In a first step the region of interest is selected for morphometric analysis (red contour) (A), followed by the classification of the detected cells in “tumor cells” (red contour), and “non-tumor cells” (yellow contour) (B). The result is a visual representation of Melan A-positive tumor cells (red mask), Melan A-negative tumor cells (blue mask), and non-tumor cells (yellow mask) following image processing using the cell detection and classification parameters previously defined by the user (C, D, E).

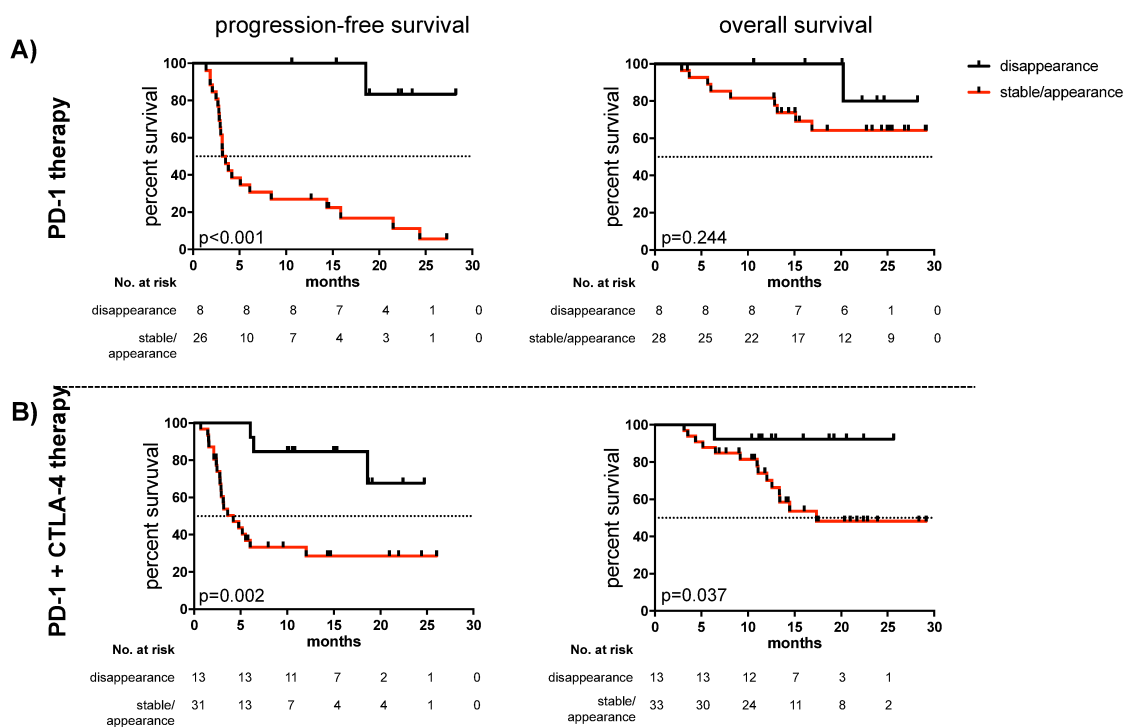

**Supplemental Figure 4:** Correlation of dynamics of NY-ESO-1- / Melan-A-reactive T cells from the circulation with clinical outcome of patients under PD-1 blockade alone A) or in combination with CTLA-4 inhibition B) in a combined analysis of cohort A and B. Probability of overall survival (right panel) and progression-free survival (left panel) among patients with disappearing (black arm) or appearing/stable (red arm) TAA-specific T cells. Progression-free survival could not be evaluated for 4 patients.

**Supplemental Table 1: Prior therapies in the combined cohorts**

| factor                | patients |      |        | 1-year survival rate (%) | overall survival |             |              |
|-----------------------|----------|------|--------|--------------------------|------------------|-------------|--------------|
|                       | n        | %    | % dead |                          | HZ               | 95% CI      | P (log-rank) |
| prior therapy         |          |      |        |                          |                  |             |              |
| yes                   | 45       | 40.5 | 40.0   | 73.3                     | 1.07             | 0.57 – 1.98 | 0.838        |
| no                    | 66       | 59.5 | 34.8   | 76.5                     | 1                |             |              |
| checkpoint therapy    |          |      |        |                          |                  |             |              |
| yes                   | 18       | 16.2 | 50.0   | 66.7                     | 1.23             | 0.85 – 1.78 | 0.276        |
| no                    | 93       | 83.8 | 34.4   | 76.9                     | 1                |             |              |
| radiation             |          |      |        |                          |                  |             |              |
| yes                   | 14       | 12.6 | 35.7   | 71.4                     | 0.94             | 0.37 – 2.41 | 0.902        |
| no                    | 97       | 87.4 | 37.1   | 75.5                     | 1                |             |              |
| chemotherapy          |          |      |        |                          |                  |             |              |
| yes                   | 8        | 7.2  | 50.0   | 62.5                     | 1.15             | 0.69 – 1.93 | 0.590        |
| no                    | 103      | 92.8 | 35.9   | 76.1                     | 1                |             |              |
| MAP-kinase inhibitors |          |      |        |                          |                  |             |              |
| yes                   | 13       | 11.7 | 53.8   | 61.5                     | 1.39             | 0.92 – 2.09 | 0.107        |
| no                    | 98       | 88.3 | 34.3   | 76.7                     | 1                |             |              |

**Supplemental Table 2:** Subsequent therapies of patients with discontinuation of treatment

| factor                | patients |      |        | 1-year survival rate (%) | overall survival |             |              |
|-----------------------|----------|------|--------|--------------------------|------------------|-------------|--------------|
|                       | n        | %    | % dead |                          | HZ               | 95% CI      | P (log-rank) |
| subsequent therapy    |          |      |        |                          |                  |             |              |
| yes                   | 57       | 51.4 | 43.9   | 78.4                     | 1.39             | 0.74 – 2.60 | 0.306        |
| no                    | 54       | 48.6 | 29.6   | 71.3                     | 1                |             |              |
| checkpoint therapy    |          |      |        |                          |                  |             |              |
| yes                   | 16       | 28.1 | 43.7   | 80.8                     | 1.13             | 0.47 – 2.73 | 0.788        |
| no                    | 41       | 71.9 | 43.9   | 77.4                     | 1                |             |              |
| radiation             |          |      |        |                          |                  |             |              |
| yes                   | 27       | 47.4 | 55.6   | 81.3                     | 1.94             | 0.84 – 4.43 | 0.111        |
| no                    | 30       | 52.6 | 33.3   | 75.5                     | 1                |             |              |
| chemotherapy          |          |      |        |                          |                  |             |              |
| yes                   | 13       | 22.8 | 69.2   | 61.5                     | 2.47             | 1.08 – 5.66 | 0.027        |
| no                    | 44       | 77.2 | 36.4   | 83.8                     | 1                |             |              |
| MAP-kinase inhibitors |          |      |        |                          |                  |             |              |
| yes                   | 17       | 29.8 | 35.3   | 81.9                     | 0.59             | 0.23 – 1.50 | 0.263        |
| no                    | 40       | 70.2 | 47.5   | 76.9                     | 1                |             |              |

**Supplemental Table 3:** Univariate analyses of NY-ESO-1-, Melan-A- and Flu-reactive T cell populations before start of ICB.

|          | feature                          | patients |      |        | 1-year survival rate |             | 2-year survival rate |             | overall survival |             |              | progression free survival |                   |        |               |              |  |
|----------|----------------------------------|----------|------|--------|----------------------|-------------|----------------------|-------------|------------------|-------------|--------------|---------------------------|-------------------|--------|---------------|--------------|--|
|          |                                  | n        | %    | % dead | %                    | 95% CI      | %                    | 95% CI      | HR               | 95% CI      | p (log-rank) | median PFS [months]       | median PFS 95% CI | HR PFS | HR PFS 95% CI | p (log-rank) |  |
|          | <b>NY-ESO-1-reactive T cells</b> |          |      |        |                      |             |                      |             |                  |             |              |                           |                   |        |               |              |  |
| cohort A | present                          | 61       | 84.7 | 37.7   | 71.1                 | 65.1 – 77.1 | 54.7                 | 47.0 – 62.4 | 0.83             | 0.31 – 2.18 | 0.702        | 5                         | 0.7 – 9.3         | 0.63   | 0.29 – 1.37   | 0.238        |  |
|          | absent                           | 11       | 15.3 | 45.4   | 54.5                 | 39.5 – 69.5 | 54.5                 | 39.5 – 69.5 | 1                |             |              | 3                         | 1.5 – 4.5         | 1      |               |              |  |
| cohort B | present                          | 37       | 94.9 | 32.4   | 86.3                 | 80.6 – 92.0 | 69.4                 | 61.2 – 77.6 | 1.12             | 0.14 – 8.82 | 0.912        | 6                         | 2.2 – 9.7         | 2.06   | 0.28 – 15.31  | 0.470        |  |
|          | absent                           | 2        | 5.1  | 50.0   | 100                  | -           | 50.0                 | 14.6 – 85.4 | 1                |             |              | 2                         | n.a.              | 1      |               |              |  |
|          | <b>Melan-A-reactive T cells</b>  |          |      |        |                      |             |                      |             |                  |             |              |                           |                   |        |               |              |  |
| cohort A | present                          | 42       | 60.0 | 35.7   | 70.8                 | 63.7 – 77.9 | 57.4                 | 48.2 – 66.6 | 1.16             | 0.54 – 2.47 | 0.708        | 5                         | 0.0 – 11.2        | 0.75   | 0.42 – 1.34   | 0.326        |  |
|          | absent                           | 28       | 40.0 | 42.9   | 65.9                 | 56.6 – 75.2 | 50.7                 | 40.1 – 61.3 | 1                |             |              | 3                         | 1.1 – 4.9         | 1      |               |              |  |
| cohort B | present                          | 31       | 79.5 | 32.3   | 86.8                 | 80.7 – 92.9 | 70.8                 | 61.9 – 79.7 | 0.99             | 0.27 – 3.63 | 0.985        | 8                         | 4.3 – 11.7        | 0.91   | 0.34 – 2.44   | 0.851        |  |
|          | absent                           | 8        | 20.5 | 37.5   | 87.5                 | 75.8 – 99.2 | 58.3                 | 39.7 – 76.9 | 1                |             |              | 3                         | 0.2 – 5.8         | 1      |               |              |  |
|          | <b>Flu-reactive T cells</b>      |          |      |        |                      |             |                      |             |                  |             |              |                           |                   |        |               |              |  |
| cohort A | present                          | 70       | 97.2 | 38.6   | 67.5                 | 61.8 – 73.2 | 55.9                 | 49.0 – 62.8 | 0.78             | 0.10 – 5.74 | 0.804        | 4                         | 2.1 – 5.8         | 1.52   | 0.21 – 11.09  | 0.673        |  |
|          | absent                           | 2        | 2.8  | 50.0   | 100                  | n.a.        | 0                    | 0           | 1                |             |              | 3                         | n.a.              | 1      |               |              |  |
| cohort B | present                          | 38       | 97.4 | 31.6   | 86.7                 | 81.1 – 92.3 | 70.3                 | 62.3 – 78.3 | 0.36             | 0.05 – 2.83 | 0.311        | 6                         | 2.2 – 9.8         | 0.82   | 0.11 – 6.13   | 0.846        |  |
|          | absent                           | 1        | 2.6  | 100    | 100                  | n.a.        | 0                    | 0           | 1                |             |              | 2                         | n.a.              | 1      |               |              |  |



**Supplemental Table 4: Modelling peripheral TAA-reactive T cell signatures under ICB.**

|          | factor                      | patients |      |        | 1-year survival rate |             | 2-year survival rate |             | overall survival |              |              | progression free survival |                      |           |                  |              |  |
|----------|-----------------------------|----------|------|--------|----------------------|-------------|----------------------|-------------|------------------|--------------|--------------|---------------------------|----------------------|-----------|------------------|--------------|--|
|          |                             | n        | %    | % dead | %                    | 95% CI      | %                    | 95% CI      | HR               | 95% CI       | P (log-rank) | Median PFS<br>[months]    | Median PFS<br>95% CI | HR<br>PFS | HR PFS<br>95% CI | P (log rank) |  |
|          | <b>TAA-reactive T cells</b> |          |      |        |                      |             |                      |             |                  |              |              |                           |                      |           |                  |              |  |
| cohort A | disappearance               | 15       | 30.0 | 13.3   | 93.3                 | 86.9 – 99.7 | 77.8                 | 62.6 – 93.0 | 0.25             | 0.09 - 0.67  | 0.045        | not reached               | n.a.                 | 0.13      | 0.06– 0.27       | <0.001       |  |
|          | appearance/stable           | 35       | 70.0 | 42.9   | 66.5                 | 58.2 – 74.8 | 50.6                 | 41.1 – 60.1 | 1                |              |              | 3                         | 2.1 – 3.9            | 1         |                  |              |  |
| cohort B | disappearance               | 6        | 18.8 | 0.0    | 100                  | n.a.        | 100                  | n.a.        | 0.03             | 0.00 – 63.69 | 0.160        | not reached               | n.a.                 | 0.14      | 0.05 – 0.37      | 0.020        |  |
|          | appearance/stable           | 26       | 81.3 | 30.8   | 88.1                 | 81.6 – 94.6 | 64.1                 | 53.7 – 74.5 | 1                |              |              | 5                         | 1.2 – 8.8            | 1         |                  |              |  |
|          | <b>Flu-reactive T cells</b> |          |      |        |                      |             |                      |             |                  |              |              |                           |                      |           |                  |              |  |
| cohort A | disappearance               | 7        | 14.0 | 57.1   | 57.1                 | 38.4 – 75.8 | 28.6                 | 6.3 – 50.9  | 2.18             | 0.51 – 9.24  | 0.162        | 4                         | 0.0 – 7.8            | 1.43      | 0.48 – 4.27      | 0.457        |  |
|          | appearance/stable           | 43       | 86.0 | 30.2   | 77.4                 | 70.7 – 84.1 | 64.1                 | 55.8 – 72.4 | 1                |              |              | 6                         | 0.0 – 18.0           | 1         |                  |              |  |
| cohort B | disappearance               | 8        | 25.0 | 25.0   | 85.7                 | 72.5 – 98.9 | 64.3                 | 43.3 – 85.3 | 1.14             | 0.22 – 5.98  | 0.872        | 3                         | n.a.                 | 0.92      | 0.31 – 2.74      | 0.887        |  |
|          | appearance/stable           | 24       | 75.0 | 25.0   | 91.7                 | 86.1 – 97.3 | 71.3                 | 61.2 – 81.4 | 1                |              |              | 8                         | 0.0 – 19.0           | 1         |                  |              |  |

**Supplemental Table 5: Univariate analyses of demographic data before start of ICB.**

|          | feature            | patients |      |        | 1-year survival rate |             | 2-year survival rate |             | overall survival |             |                   | progression free survival |                   |        |               |                   |  |
|----------|--------------------|----------|------|--------|----------------------|-------------|----------------------|-------------|------------------|-------------|-------------------|---------------------------|-------------------|--------|---------------|-------------------|--|
|          |                    | n        | %    | % dead | %                    | 95% CI      | %                    | 95% CI      | HR               | 95% CI      | p (log-rank test) | median PFS [months]       | median PFS 95% CI | HR PFS | HR PFS 95% CI | p (log-rank test) |  |
|          | <b>age [years]</b> |          |      |        |                      |             |                      |             |                  |             |                   |                           |                   |        |               |                   |  |
| cohort A | ≥68                | 38       | 52.8 | 36.8   | 70.3                 | 62.7 – 77.8 | 56.7                 | 47.2 – 66.2 | 0.86             | 0.41 – 1.80 | 0.684             | 5                         | 0.0 – 10.3        | 0.61   | 0.35 – 1.07   | 0.084             |  |
|          | <68                | 34       | 47.2 | 41.2   | 66.1                 | 57.8 – 74.4 | 52.6                 | 42.6 – 62.6 | 1                |             |                   | 4                         | 1.8 – 6.2         | 1      |               |                   |  |
| cohort B | ≥68                | 14       | 35.9 | 50.0   | 71.4                 | 59.3 – 83.5 | 42.9                 | 28.0 – 57.8 | 2.69             | 0.90 – 8.05 | 0.066             | 3                         | n.a.              | 1.04   | 0.44 – 2.44   | 0.956             |  |
|          | <68                | 25       | 64.1 | 24.0   | 95.7                 | 91.4 – 100  | 81.1                 | 72.5 – 89.7 | 1                |             |                   | 8                         | 4.6 – 11.4        | 1      |               |                   |  |
|          | <b>sex</b>         |          |      |        |                      |             |                      |             |                  |             |                   |                           |                   |        |               |                   |  |
| cohort A | female             | 28       | 38.9 | 38.6   | 71.4                 | 62.9 – 79.9 | 54.8                 | 43.7 – 65.9 | 0.97             | 0.45 – 2.07 | 0.936             | 4                         | 0.0 – 8.3         | 0.98   | 0.55 – 1.73   | 0.942             |  |
|          | male               | 44       | 61.1 | 37.8   | 65.9                 | 58.4 – 73.4 | 54.3                 | 45.5 – 63.1 | 1                |             |                   | 4                         | 2.3 – 5.7         | 1      |               |                   |  |
| cohort B | female             | 13       | 33.3 | 30.8   | 83.9                 | 73.5 – 94.3 | 62.9                 | 47.9 – 77.9 | 0.92             | 0.28 – 3.00 | 0.891             | 2                         | 0.9 – 3.1         | 1.46   | 0.62 – 3.45   | 0.379             |  |
|          | male               | 26       | 66.7 | 34.6   | 88.5                 | 82.2 – 94.8 | 70.4                 | 60.8 – 80.0 | 1                |             |                   | 8                         | 3.3 – 12.7        | 1      |               |                   |  |
|          | <b>M category</b>  |          |      |        |                      |             |                      |             |                  |             |                   |                           |                   |        |               |                   |  |
| cohort A | M1a or b           | 32       | 44.4 | 40.6   | 71.3                 | 63.2 – 79.4 | 54.9                 | 45.0 – 64.8 | 0.94             | 0.44 – 1.97 | 0.861             | 3                         | 0.8 – 5.2         | 1.24   | 0.71 – 2.18   | 0.448             |  |
|          | M1c                | 40       | 55.6 | 37.5   | 66.2                 | 58.5 – 73.9 | 55.4                 | 45.8 – 65.0 | 1                |             |                   | 7                         | 1.1 – 12.9        | 1      |               |                   |  |
| cohort B | M1a or b           | 5        | 12.8 | 40.0   | 80.0                 | 62.1 – 97.9 | 40.0                 | 10.3 – 69.7 | 1.29             | 0.28 – 5.84 | 0.743             | undefined                 | n.a.              | 0.44   | 0.10 – 1.86   | 0.247             |  |
|          | M1c                | 34       | 87.2 | 32.3   | 88.0                 | 82.4 – 93.6 | 70.3                 | 61.9 – 78.7 | 1                |             |                   | 5                         | 1.4 – 8.6         | 1      |               |                   |  |
|          | <b>LDH</b>         |          |      |        |                      |             |                      |             |                  |             |                   |                           |                   |        |               |                   |  |
| cohort A | ULN                | 32       | 44.4 | 37.5   | 75.0                 | 67.3 – 82.7 | 54.9                 | 44.3 – 65.5 | 0.95             | 0.45 – 2.01 | 0.891             | 3                         | 1.3 – 4.7         | 1.18   | 0.67 – 2.09   | 0.550             |  |
|          | LLN                | 40       | 55.6 | 40.0   | 63.3                 | 55.4 – 71.2 | 54.8                 | 45.8 – 63.8 | 1                |             |                   | 6                         | 2.3 – 9.7         | 1      |               |                   |  |
| cohort B | ULN                | 15       | 39.5 | 33.3   | 86.7                 | 77.9 – 95.5 | 70.9                 | 58.5 – 83.3 | 0.86             | 0.27 – 2.75 | 0.797             | 4                         | 0.2 – 7.8         | 1.21   | 0.53 – 2.76   | 0.648             |  |
|          | LLN                | 23       | 59.5 | 30.4   | 86.7                 | 79.5 – 93.8 | 64.6                 | 53.6 – 75.6 | 1                |             |                   | 8                         | 0.0 – 19.8        | 1      |               |                   |  |

Abbreviations: ULN, upper limit of normal; LLN, lower limit of normal

**Supplemental Table 6:** Combined modelling of cohort A's and B's peripheral TAA-reactive T cell signatures under ICB.

| factor            | patients |      |        | 1-year survival rate |             | 2-year survival rate |             | overall survival |             |             | 1-year PFS |             | progression free survival |               |              |
|-------------------|----------|------|--------|----------------------|-------------|----------------------|-------------|------------------|-------------|-------------|------------|-------------|---------------------------|---------------|--------------|
|                   | n        | %    | % dead | %                    | 95% CI      | %                    | 95% CI      | HR               | 95% CI      | p(log-rank) | %          | 95% CI      | HR PFS                    | HR PFS 95% CI | p (log rank) |
| disappearance     | 21       | 25.6 | 9.5    | 95.2                 | 90.6 – 99.8 | 83.3                 | 71.4 – 95.2 | 0.21             | 0.05 – 0.91 | 0.021       | 90.5       | 84.1 – 96.9 | 0.13                      | 0.05 – 0.36   | <0.001       |
| appearance/stable | 61       | 74.4 | 37.7   | 75.9                 | 70.3 – 81.5 | 56.5                 | 49.4 – 63.6 | 1                |             |             | 27.9       | 21.8 – 34.0 | 1                         |               |              |

**Supplemental Table 7:** Combined modelling of alterations in peripheral TAA-reactive T cell signatures in cohort A and B under ICB.

| factor            | patients |      |        | 1-year survival rate |             | 2-year survival rate |             | 1-year PFS |             |
|-------------------|----------|------|--------|----------------------|-------------|----------------------|-------------|------------|-------------|
|                   | n        | %    | % dead | %                    | 95% CI      | %                    | 95% CI      | %          | 95% CI      |
| both disappear    | 5        | 6.1  | 0      | 100                  | n.a.        | 100                  | n.a.        | 100        | n.a.        |
| one disappears    | 16       | 19.5 | 12.5   | 93.8                 | 87.7 – 99.9 | 80.4                 | 67.0 – 93.8 | 87.5       | 79.2 – 95.8 |
| appearance/stable | 61       | 74.4 | 37.7   | 75.9                 | 70.3 – 81.5 | 56.5                 | 49.4 – 63.6 | 27.9       | 21.8 – 34.0 |
